# Supplementary material for: The Slingshot phosphatase 2 is required for acrosome biogenesis during spermatogenesis in mice
Source: eLife journal article supplement (doi:10.7554/elife.83129), 2023-03-21
Supplement: fig2-data1 [file Tunel-Counting.xlsx]

## Sheet: Sheet1
Testis													Epididymis
TUNEL(+) cell counting 1				TUNEL(+) cell counting 2				TUNEL(+) cell counting 3					TUNEL(+) cell counting 1				TUNEL(+) cell counting 2				TUNEL(+) cell counting 3
KO		WT		KO		WT		KO		WT			KO		WT		KO		WT		KO		WT
tubule	TUNEL(+)	tubule	TUNEL(+)	tubule	TUNEL(+)	tubule	TUNEL(+)	tubule	TUNEL(+)	tubule	TUNEL(+)		duct	TUNEL(+)	duct	TUNEL(+)	duct	TUNEL(+)	duct	TUNEL(+)	duct	TUNEL(+)	duct	TUNEL(+)
1	11	1	1	1	5	1	2	1	9	1	3		1	28	1	5	1	35	1	3	1	41	1	4
2	5	2	2	2	8	2	0	2	6	2	2		2	39	2	2	2	52	2	5	2	45	2	3
3	4	3	1	3	10	3	1	3	7	3	2		3	37	3	6	3	38	3	2	3	25	3	1
4	8	4	3	4	5	4	1	4	9	4	0		4	40	4	2	4	24	4	6	4	44	4	5
5	12	5	0	5	5	5	0	5	8	5	0		5	38	5	3	5	30	5	4	5	39	5	3
6	9	6	1	6	6	6	1	6	7	6	2		6	29	6	3	6	48	6	3	6	34	6	2
7	11	7	0	7	7	7	1	7	9	7	3		7	42	7	3	7	27	7	6	7	39	7	5
8	10	8	1	8	9	8	0	8	11	8	2		8	25	8	4	8	35	8	5	8	42	8	2
9	7	9	2	9	7	9	2	9	5	9	0		9	28	9	2	9	29	9	4	9	38	9	5
10	8	10	1	10	10	10	0	10	6	10	1		10	29	10	4	10	20	10	2	10	39	10	1
11	7	11	0	11	10	11	1	11	5	11	1		11	33	11	3	11	33	11	4	11	37	11	6
12	11	12	1	12	9	12	3	12	7	12	0		12	51	12	6	12	38	12	6	12	45	12	3
13	11	13	4	13	9	13	0	13	10	13	1		13	22	13	3	13	19	13	8	13	27	13	2
14	13	14	2	14	7	14	4	14	13	14	1		14	40	14	4	14	34	14	3	14	29	14	4
15	9	15	0	15	5	15	3	15	11	15	1		15	37	15	5	15	40	15	2	15	32	15	2
16	9	16	1	16	6	16	0	16	14	16	1		16	45	16	2	16	37	16	4	16	51	16	5
17	10	17	1	17	7	17	1	17	5	17	1		17	39	17	2	17	26	17	5	17	43	17	3
18	9	18	0	18	9	18	0	18	4	18	0		18	52	18	5	18	31	18	3	18	37	18	6
19	8	19	1	19	10	19	4	19	4	19	1		19	44	19	1	19	22	19	1	19	49	19	3
20	7	20	3	20	9	20	1	20	6	20	0		20	35	20	4	20	33	20	3	20	31	20	1
21	10	21	0	21	7	21	0	21	13	21	1			733		69		651		79		767		66
22	11	22	1	22	7	22	1	22	12	22	1
23	14	23	0	23	8	23	0	23	10	23	1
24	10	24	2	24	9	24	0	24	7	24	3
25	9	25	1	25	11	25	1	25	12	25	0
26	7	26	2	26	9	26	2	26	6	26	2
27	7	27	2	27	11	27	2	27	6	27	1
28	7	28	0	28	8	28	0	28	10	28	0
29	8	29	1	29	10	29	3	29	6	29	1
30	8	30	0	30	10	30	2	30	7	30	0
31	7	31	1	31	13	31	1	31	9	31	1
32	10	32	2	32	9	32	2	32	5	32	2
33	11	33	2	33	13	33	1	33	12	33	1
34	13	34	2	34	7	34	2	34	11	34	2
35	11	35	1	35	5	35	1	35	7	35	1
36	9	36	3	36	6	36	3	36	6	36	0
37	9	37	0	37	10	37	1	37	8	37	1
38	8	38	1	38	15	38	2	38	9	38	2
39	9	39	0	39	14	39	0	39	11	39	2
40	13	40	1	40	9	40	2	40	6	40	2
41	9	41	1	41	11	41	0	41	8	41	1
42	8	42	0	42	12	42	1	42	12	42	2
43	8	43	1	43	11	43	3	43	6	43	2
44	13	44	1	44	10	44	0	44	10	44	1
45	11	45	3	45	13	45	1	45	13	45	0
46	11	46	0	46	15	46	1	46	6	46	2
47	10	47	2	47	14	47	2	47	9	47	1
48	7	48	1	48	4	48	2	48	7	48	1
49	9	49	0	49	4	49	0	49	8	49	2
50	14	50	1	50	11	50	1	50	11	50	1
	470		57		449		62		419		59
