# Supplementary material for: The Slingshot phosphatase 2 is required for acrosome biogenesis during spermatogenesis in mice
Source: eLife journal article supplement (doi:10.7554/elife.83129), 2023-03-21
Supplement: fig6-data1 [file Co-localization.xlsx]

## Sheet: GOPC
Co-localization(%)	Ssh2+/+	Ssh2-/-
1	81	16
2	72	33
3	77	19
4	76	27

## Sheet: LC3
Co-localization(%)	Ssh2+/+	Ssh2-/-
1	92	77
2	86	80
3	89	84
4	90	70
